# Supplementary material for: Heat stress destabilizes symbiotic nutrient cycling in corals
Source: PubMed Central journal article supplement — Proc Natl Acad Sci U S A. 2021 Jan 26;118(5):e2022653118. doi: 10.1073/pnas.2022653118 (PMC7865147; doi:10.1073/pnas.2022653118), 2021-01-26
Supplement: pnas.2022653118.sapp.pdf [file pnas.2022653118.sapp.pdf]

**Supplementary Information for**  
Heat stress destabilizes symbiotic nutrient cycling in corals.

Nils Rådecker, Claudia Pogoreutz, Hagen M. Gegner, Anny Cardenas, Florian Roth, Jeremy Bougoure, Paul Guagliardo, Christian Wild, Mathieu Pernice, Jean-Baptiste Raina, Anders Meibom, Christian R. Voolstra

Nils Rådecker  
Email: [nils.radecker@kaust.edu.sa](mailto:nils.radecker@kaust.edu.sa)

**This PDF file includes:**

Figures S1 to S4  
Tables S1 to S3  
Legends for Datasets S1

**Other supplementary materials for this manuscript include the following:**

Datasets S1

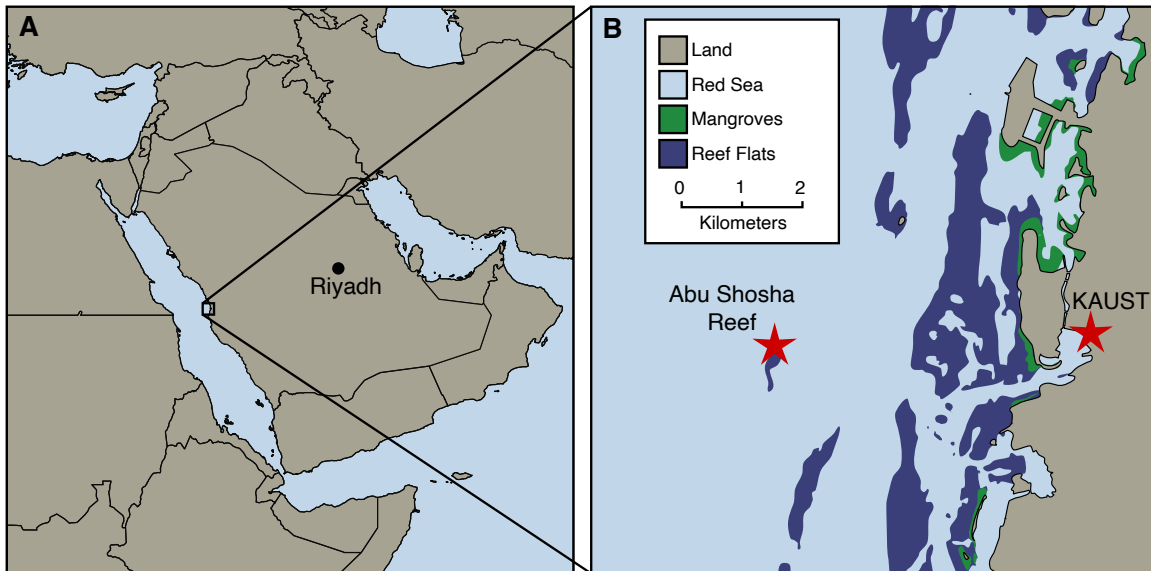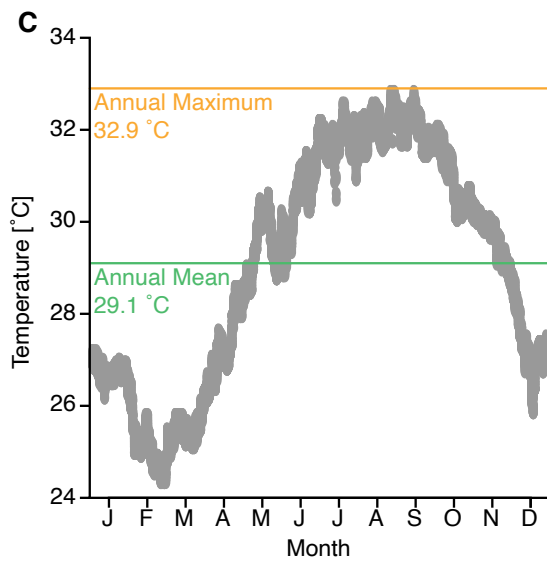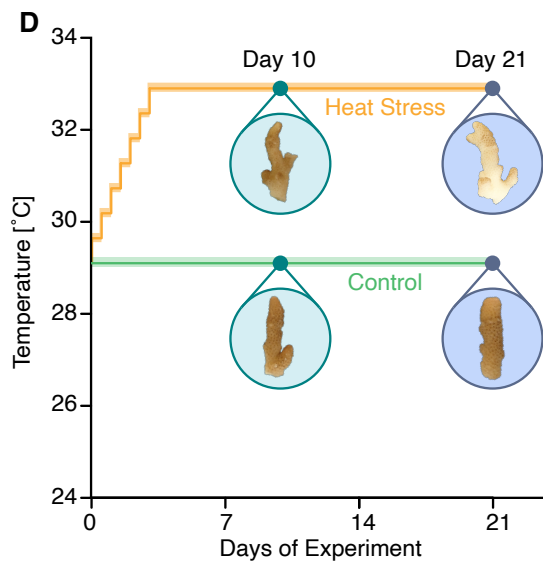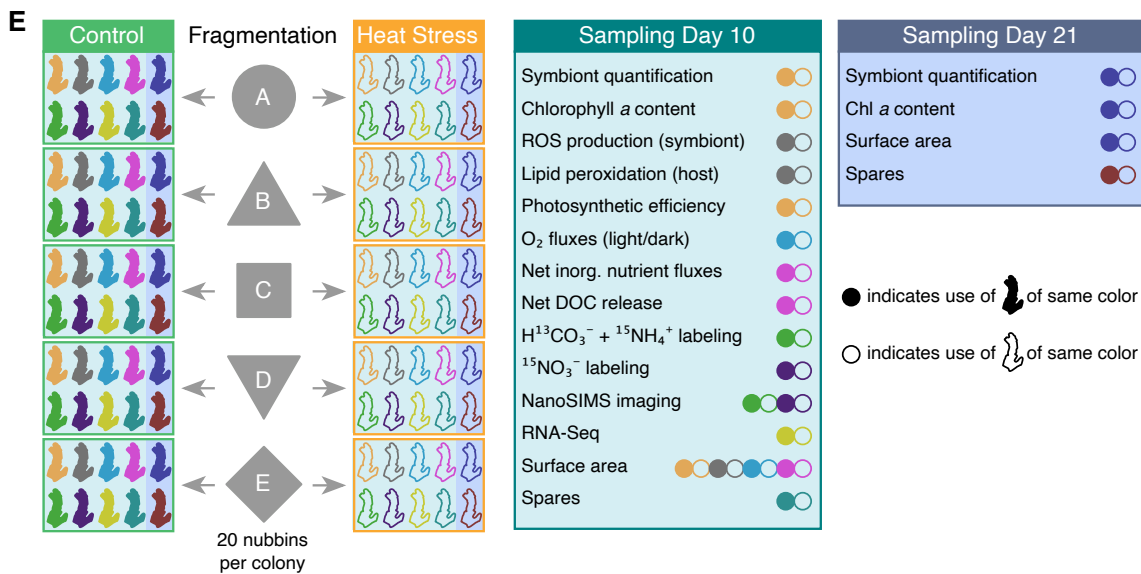

**Fig. S1.** Overview of the sampling site and its environmental conditions. **A,B** Coral colonies were collected at Abu Shosha reef (22°18'16.3"N; 39°02'57.7"E) in the central Red Sea, approximately 5 km off the Saudi Arabian coast. **C** The temperature profile for Abu Shosha reef at 5m water depth for the year 2017 was used to identify the annual mean and maximum temperature of a representative year without mass-bleaching. **D** Based on this information, corals were exposed to either annual mean temperatures (29.1 °C, control) or annual maximum temperatures (32.9 °C, heat stress) for a 21-day aquaria experiment. **E** Assignment of coral nubbins for experimental procedures from 5 colonies across aquaria and treatments. Corals nubbins were sampled on days 10 and 21 of the experiment. The respective color of the coral nubbins indicate their use in analysis of matching dot color.

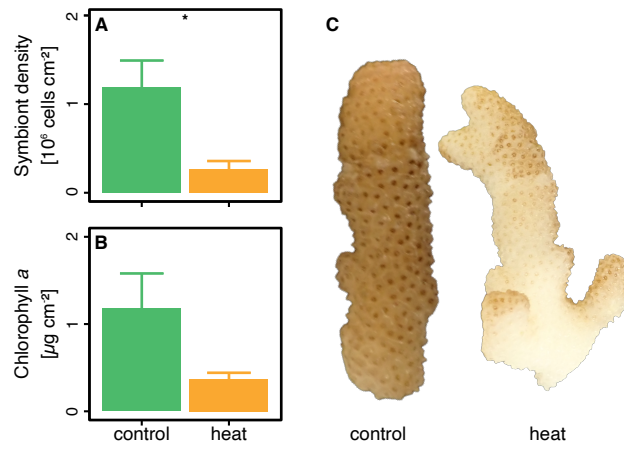

**Fig. S2.** State of symbiosis on day 21 of the experiment. **A-C** Corals showed clear visual signs of bleaching and a significant decline in symbiont densities as well as a reduction in chlorophyll a content. Bars indicate mean  $\pm$  SE. Asterisks indicated significant differences between treatments.

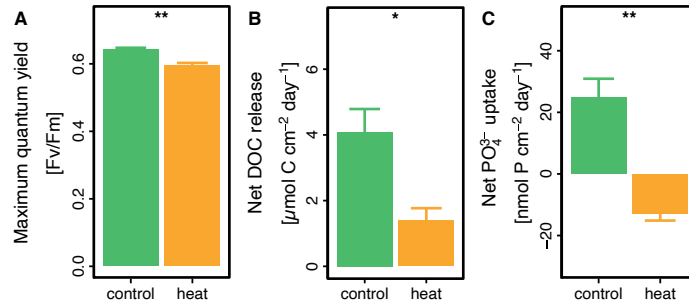

**Fig. S3.** Photophysiology and nutrient fluxes on day 10 of the experiment. **A** Maximum photosynthetic quantum yield of fragments after 30 min dark acclimation. **B** Net dissolved organic carbon (DOC) release from the coral holobiont. **C** Net phosphate ( $\text{PO}_4^{3-}$ ) uptake from the coral holobiont. Negative bars indicate a net release of  $\text{PO}_4^{3-}$ . Bars indicate mean  $\pm$  SE. Asterisks indicated significant differences between treatments.

### *Stylophora pistillata*

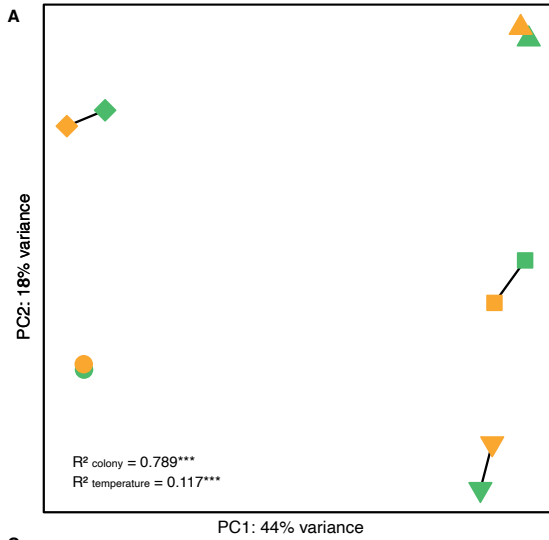

### *Symbiodinium microadriaticum*

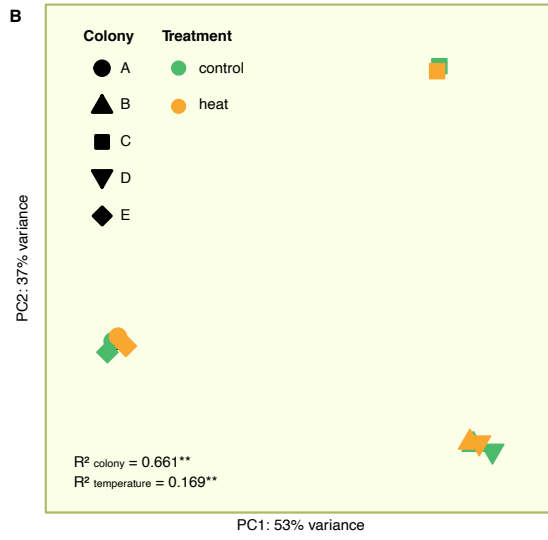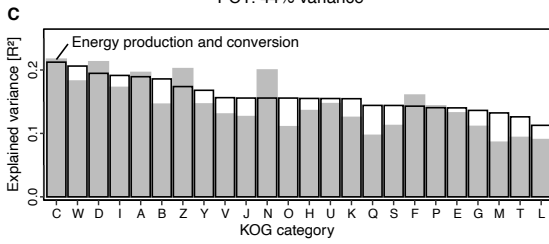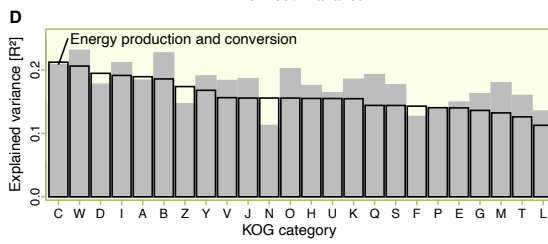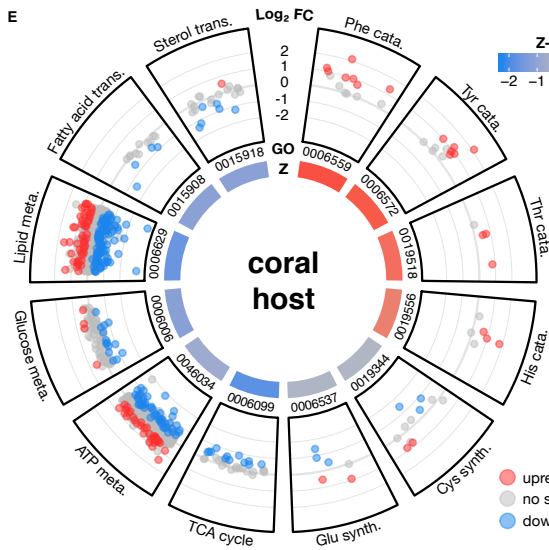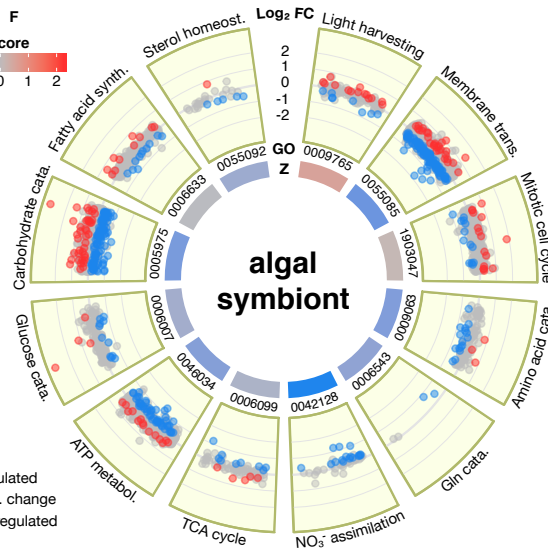

**Fig. S4.** Gene expression of **A,C,E** *Stylophora pistillata* and **B,D,F** *Symbiodinium microadriaticum* on day 10 of heat stress. **A,B** Principal component analysis of gene expression profiles. Lines connect control (green) and heat stress (orange) samples from the same colony of origin. **C,D** Permutational analysis of variance (Permanova) analyses of the proportion of variance in gene expression explained by the temperature treatment for each subset of genes related to individual EuKaryotic Orthologous Groups (KOGs). Grey bars indicate results for the respective symbiotic partner whereas empty black bars indicate mean responses of both symbiotic partners combined. **E,F** Selected significantly enriched Gene Ontology (GO) terms related to carbon and amino acid metabolism as well as inorganic nutrient transport. Points indicate mean  $\log_2$  fold change of expression of genes associated to GO terms in heat stress compared to control conditions. Blue points indicate significant downregulation, whereas red points indicate significant upregulation. Boxes below individual GO terms indicate the overall direction of regulation (Z-score). ATP = adenosine triphosphate, cata. = catabolism, Cys = cysteine, Gln = glutamine, Glu = glutamate, His = histidine, homeost. = homeostasis, meta. = metabolism, Ser = serine, Phe = phenylalanine, synth. = biosynthesis, TCA = tricarboxylic acid, trans. = transport, Tyr = tyrosine. See Tab. S2, S3 for an overview of Permanova results. For a complete list of differentially expressed genes as well as significant GO terms see Dataset S1.

**Table S1.** Results of statistical analysis for physiological and NanoSIMS measurements. Physiological measurements were analyzed in a paired design based on the mother colony. Likewise, log-transformed NanoSIMS data were analyzed in linear mixed models using colony of origin as a random effect.

| Day | Response parameter                                                   | Test                  | Replicates | Statistic | <i>p</i> |
|-----|----------------------------------------------------------------------|-----------------------|------------|-----------|----------|
| 21  | Symbiont density                                                     | Paired <i>t</i> -test | 10         | 3.728     | 0.020    |
| 21  | Chlorophyll <i>a</i> content                                         | Paired Wilcoxon       | 10         | 15.000    | 0.063    |
| 10  | Symbiont density                                                     | Paired <i>t</i> -test | 10         | 0.347     | 0.746    |
| 10  | Chlorophyll <i>a</i> content                                         | Paired <i>t</i> -test | 10         | 0.454     | 0.674    |
| 10  | Photosynthetic efficiency                                            | Paired <i>t</i> -test | 10         | 6.778     | 0.002    |
| 10  | Gross photosynthesis                                                 | Paired <i>t</i> -test | 10         | -3.469    | 0.026    |
| 10  | Respiration                                                          | Paired <i>t</i> -test | 10         | -3.762    | 0.020    |
| 10  | Dissolved organic carbon release                                     | Paired <i>t</i> -test | 10         | 3.841     | 0.018    |
| 10  | NH <sub>4</sub> <sup>+</sup> uptake                                  | Paired <i>t</i> -test | 10         | -15.991   | 0.001    |
| 10  | NO <sub>3</sub> <sup>-</sup> uptake                                  | Paired <i>t</i> -test | 10         | -3.041    | 0.038    |
| 10  | PO <sub>4</sub> <sup>3-</sup> uptake                                 | Paired <i>t</i> -test | 10         | -6.328    | 0.003    |
| 10  | ROS release (symbiont)                                               | Paired <i>t</i> -test | 10         | -4.407    | 0.012    |
| 10  | Lipid peroxidation (host)                                            | Paired <i>t</i> -test | 10         | -5.735    | 0.005    |
| 10  | Mitotic index                                                        | Paired <i>t</i> -test | 10         | -2.896    | 0.044    |
| 10  | H <sup>13</sup> CO <sub>3</sub> <sup>-</sup> assimilation (host)     | Linear mixed model    | 250        | 8.000     | 0.005    |
| 10  | H <sup>13</sup> CO <sub>3</sub> <sup>-</sup> assimilation (symbiont) | Linear mixed model    | 250        | 52.88     | 0.001    |
| 10  | <sup>15</sup> NH <sub>4</sub> <sup>+</sup> assimilation (host)       | Linear mixed model    | 250        | 6.330     | 0.013    |
| 10  | <sup>15</sup> NH <sub>4</sub> <sup>+</sup> assimilation (symbiont)   | Linear mixed model    | 250        | 5.528     | 0.020    |
| 10  | <sup>15</sup> NO <sub>3</sub> <sup>-</sup> assimilation (host)       | Linear mixed model    | 140        | 40.715    | 0.001    |
| 10  | <sup>15</sup> NO <sub>3</sub> <sup>-</sup> assimilation (host)       | Linear mixed model    | 140        | 72.343    | 0.001    |



**Table S2.** Permutational multivariate analysis of variance (PERMANOVA) on the effects of mother colony and temperature on the transcriptomic response of *Stylophora pistillata*. Responses were assessed for the global transcriptome as well as for specific subsets of genes assigned to individual EuKaryotic Orthologous Groups (KOGs) categories.

| Response category                                                     | Genes | Colony effect  |        |       | Temperature effect |        |       |
|-----------------------------------------------------------------------|-------|----------------|--------|-------|--------------------|--------|-------|
|                                                                       |       | R <sup>2</sup> | F      | p     | R <sup>2</sup>     | F      | p     |
| Global transcriptome                                                  | 25769 | 0.789          | 8.362  | 0.001 | 0.117              | 4.938  | 0.001 |
| <b>KOG categories</b>                                                 |       |                |        |       |                    |        |       |
| D - Cell cycle control, cell division, chromosome partitioning        | 406   | 0.692          | 7.218  | 0.001 | 0.212              | 8.867  | 0.001 |
| M - Cell wall/membrane/envelope biogenesis                            | 343   | 0.838          | 10.959 | 0.001 | 0.086              | 4.474  | 0.001 |
| N - Cell motility                                                     | 30    | 0.656          | 4.539  | 0.002 | 0.200              | 5.521  | 0.001 |
| O - Post-translational modification, protein turnover, and chaperones | 2125  | 0.788          | 7.690  | 0.001 | 0.110              | 4.296  | 0.001 |
| T - Signal transduction mechanisms                                    | 3288  | 0.810          | 8.349  | 0.001 | 0.093              | 3.840  | 0.001 |
| U - Intracellular trafficking, secretion, and vesicular transport     | 852   | 0.715          | 5.167  | 0.001 | 0.146              | 4.231  | 0.001 |
| V - Defense mechanisms                                                | 128   | 0.736          | 5.473  | 0.001 | 0.130              | 3.871  | 0.002 |
| W - Extracellular structures                                          | 120   | 0.666          | 4.393  | 0.001 | 0.182              | 4.801  | 0.001 |
| Y - Nuclear structure                                                 | 40    | 0.760          | 8.091  | 0.001 | 0.146              | 6.214  | 0.001 |
| Z - Cytoskeleton                                                      | 416   | 0.655          | 4.559  | 0.001 | 0.202              | 5.615  | 0.001 |
| A - RNA processing and modification                                   | 500   | 0.712          | 7.694  | 0.001 | 0.196              | 8.455  | 0.001 |
| B - Chromatin structure and dynamics                                  | 309   | 0.812          | 19.354 | 0.001 | 0.146              | 13.869 | 0.001 |
| J - Translation, ribosomal structure and biogenesis                   | 566   | 0.735          | 5.296  | 0.001 | 0.126              | 3.629  | 0.003 |
| K - Transcription                                                     | 1135  | 0.782          | 8.342  | 0.001 | 0.125              | 5.326  | 0.001 |
| L - Replication, recombination and repair                             | 1152  | 0.858          | 16.484 | 0.001 | 0.090              | 6.938  | 0.001 |
| C - Energy production and conversion                                  | 365   | 0.636          | 4.306  | 0.001 | 0.217              | 5.865  | 0.001 |
| E - Amino acid transport and metabolism                               | 1072  | 0.767          | 7.561  | 0.001 | 0.132              | 5.200  | 0.001 |
| F - Nucleotide transport and metabolism                               | 184   | 0.744          | 7.753  | 0.001 | 0.160              | 6.662  | 0.001 |
| G - Carbohydrate transport and metabolism                             | 898   | 0.777          | 6.885  | 0.001 | 0.111              | 3.918  | 0.001 |
| H - Coenzyme transport and metabolism                                 | 146   | 0.691          | 3.971  | 0.001 | 0.135              | 3.115  | 0.007 |
| I - Lipid transport and metabolism                                    | 432   | 0.719          | 6.573  | 0.001 | 0.172              | 6.293  | 0.001 |
| P - Inorganic ion transport and metabolism                            | 595   | 0.720          | 5.269  | 0.001 | 0.143              | 4.179  | 0.001 |
| Q - Secondary metabolites biosynthesis, transport, and catabolism     | 395   | 0.792          | 7.118  | 0.002 | 0.096              | 3.465  | 0.024 |
| R - General function prediction only                                  | 0     | NA             | NA     | NA    | NA                 | NA     | NA    |
| S - Function unknown                                                  | 4820  | 0.806          | 9.839  | 0.001 | 0.112              | 5.465  | 0.001 |

**Table S3.** Permutational multivariate analysis of variance (PERMANOVA) on the effects of mother colony and temperature on the transcriptomic response of *Symbiodinium microadriaticum*. Responses were assessed for the global transcriptome as well as for specific subsets of genes assigned to individual EuKaryotic Orthologous Groups (KOGs) categories.

| Response category                                                     | Genes | Colony effect  |       |       | Temperature effect |       |       |
|-----------------------------------------------------------------------|-------|----------------|-------|-------|--------------------|-------|-------|
|                                                                       |       | R <sup>2</sup> | F     | p     | R <sup>2</sup>     | F     | p     |
| Global transcriptome                                                  | 49109 | 0.661          | 3.877 | 0.002 | 0.169              | 3.959 | 0.002 |
| <b>KOG categories</b>                                                 |       |                |       |       |                    |       |       |
| D - Cell cycle control, cell division, chromosome partitioning        | 269   | 0.646          | 3.641 | 0.001 | 0.177              | 3.994 | 0.001 |
| M - Cell wall/membrane/envelope biogenesis                            | 298   | 0.693          | 5.412 | 0.001 | 0.179              | 5.599 | 0.001 |
| N - Cell motility                                                     | 30    | 0.770          | 6.516 | 0.002 | 0.112              | 3.795 | 0.038 |
| O - Post-translational modification, protein turnover, and chaperones | 1240  | 0.640          | 4.049 | 0.001 | 0.201              | 5.096 | 0.001 |
| T - Signal transduction mechanisms                                    | 1149  | 0.694          | 4.747 | 0.001 | 0.159              | 4.353 | 0.001 |
| U - Intracellular trafficking, secretion, and vesicular transport     | 609   | 0.690          | 4.729 | 0.001 | 0.164              | 4.483 | 0.002 |
| V - Defense mechanisms                                                | 157   | 0.693          | 5.553 | 0.001 | 0.183              | 5.861 | 0.002 |
| W - Extracellular structures                                          | 29    | 0.586          | 3.197 | 0.001 | 0.230              | 5.025 | 0.001 |
| Y - Nuclear structure                                                 | 20    | 0.468          | 1.366 | 0.171 | 0.190              | 2.221 | 0.046 |
| Z - Cytoskeleton                                                      | 417   | 0.713          | 5.071 | 0.001 | 0.146              | 4.156 | 0.005 |
| A - RNA processing and modification                                   | 404   | 0.624          | 3.242 | 0.001 | 0.183              | 3.807 | 0.001 |
| B - Chromatin structure and dynamics                                  | 124   | 0.564          | 2.685 | 0.001 | 0.226              | 4.314 | 0.001 |
| J - Translation, ribosomal structure and biogenesis                   | 685   | 0.627          | 3.353 | 0.001 | 0.186              | 3.971 | 0.001 |
| K - Transcription                                                     | 332   | 0.655          | 4.100 | 0.001 | 0.185              | 4.623 | 0.001 |
| L - Replication, recombination and repair                             | 1497  | 0.693          | 4.023 | 0.001 | 0.135              | 3.141 | 0.006 |
| C - Energy production and conversion                                  | 484   | 0.648          | 4.497 | 0.001 | 0.208              | 5.782 | 0.001 |
| E - Amino acid transport and metabolism                               | 620   | 0.712          | 5.118 | 0.001 | 0.149              | 4.274 | 0.004 |
| F - Nucleotide transport and metabolism                               | 204   | 0.763          | 6.860 | 0.001 | 0.126              | 4.537 | 0.002 |
| G - Carbohydrate transport and metabolism                             | 998   | 0.702          | 5.160 | 0.001 | 0.162              | 4.766 | 0.001 |
| H - Coenzyme transport and metabolism                                 | 307   | 0.644          | 3.549 | 0.001 | 0.175              | 3.857 | 0.001 |
| I - Lipid transport and metabolism                                    | 438   | 0.624          | 3.791 | 0.001 | 0.211              | 5.123 | 0.001 |
| P - Inorganic ion transport and metabolism                            | 641   | 0.770          | 8.358 | 0.001 | 0.138              | 6.008 | 0.001 |
| Q - Secondary metabolites biosynthesis, transport, and catabolism     | 490   | 0.656          | 4.311 | 0.001 | 0.192              | 5.048 | 0.001 |
| R - General function prediction only                                  | 0     | NA             | NA    | NA    | NA                 | NA    | NA    |
| S - Function unknown                                                  | 2571  | 0.652          | 3.808 | 0.001 | 0.176              | 4.114 | 0.001 |

**Dataset S1 (separate file).** Overview of results of differential gene expression (DGE) and corresponding gene ontology (GO) term enrichment analysis for *Stylophora pistilata* (Spis) and *Symbiodinium microadriaticum* (Smic) during heat stress at day 10 of experiment.
